# Supplementary material for: In search for biomarkers and potential drug targets for uterine serous endometrial cancer
Source: Springer Nature journal article supplement (doi:10.1007/s00432-021-03566-x), 2021-03-23
Supplement: MOESM1 [file 18995122]

## **In Search for Biomarkers and Potential Drug Targets for Uterine Serous Endometrial Cancer.**

### **Journal of Cancer Research and Clinical Oncology**

**Authors:** Dinoi Giorgia<sup>1,2</sup>, Mariani Andrea<sup>2</sup>, Martinelli Enrica<sup>3,4</sup>, Ciucci Alessandra<sup>3,4</sup>, Zannoni Gian Franco<sup>5</sup>, Weaver Amy<sup>6</sup>, Gary L Keeney<sup>7</sup>, Vasmataz George<sup>8</sup>, Anastasiadis Panagiotis Z<sup>9</sup>, Fanfani Francesco<sup>1</sup>, Scambia Giovanni<sup>1§</sup>, Gallo Daniela<sup>3,4</sup>

#### Author Affiliations

<sup>1</sup>Gynecology Oncology Unit, Department of Woman, Child and Public Health, Fondazione Policlinico Universitario A. Gemelli IRCCS, Rome, Italy;

<sup>2</sup> Division of Gynaecologic Surgery, Department of Obstetrics and Gynaecology, Mayo Clinic, Rochester, Minnesota, USA;

<sup>3</sup>Department of Life Sciences and Public Health, Section of Gynaecology and Obstetrics, Università Cattolica del Sacro Cuore, Rome, Italy;

<sup>4</sup>Unit of Translational Medicine for Woman and Child Health, Department of Woman, Child and Public Health, Fondazione Policlinico Universitario A. Gemelli IRCCS, Rome, Italy;

<sup>5</sup>Gynecopathology and Breast Pathology Unit, Department of Woman, Child and Public Health, Fondazione Policlinico Universitario A. Gemelli IRCCS, Rome, Italy;

<sup>6</sup>Division of Biomedical Statistics and Informatics, Department of Health Sciences Research, Mayo Clinic, Rochester, Minnesota, USA;

<sup>7</sup>Division of Anatomic Pathology, Mayo Clinic Rochester, Rochester, Minnesota, USA;

<sup>8</sup>Department of Molecular Medicine, Department of Laboratory Medicine & Pathology, Mayo Clinic, Rochester, Minnesota, USA;

<sup>9</sup>Department of Cancer Biology, Mayo Clinic Comprehensive Cancer Center, Jacksonville, Florida, USA.

§To whom correspondence should be addressed

Corresponding author

Giovanni Scambia

Gynecology Oncology Unit, Department of Woman, Child and Public Health, Fondazione Policlinico Universitario A. Gemelli IRCCS, Rome, Italy;

Largo A. Gemelli, 8, 00168, Rome, Italy

Tel. 0039-0630154979

Fax 0039-0630157063

E-mail: [giovanni.scambia@policlinicogemelli.it](mailto:giovanni.scambia@policlinicogemelli.it)

**Table S1.** List of Antibodies used in immunohistochemistry including specifics about antigen retrieval, working dilution and incubation.

| <b>Antigen</b>    | <b>Source</b> | <b>Clone</b> | <b>Antigen retrieval</b> | <b>Working dilution</b> | <b>Incubation</b> |
|-------------------|---------------|--------------|--------------------------|-------------------------|-------------------|
| Aurora A          | Abcam         | Polyclonal   | High 20 min              | 1:200                   | 4°C, ON           |
| p(T288)Aurora A   | Abcam         | Polyclonal   | High 20 min              | 1:200                   | 4°C, ON           |
| BRCA1             | Calbiochem    | MS110        | Low 15 min               | 1:50                    | 4°C, ON           |
| CHK1              | Abcam         | Polyclonal   | High 20 min              | 1:250                   | 4°C, ON           |
| CIP2A             | Novusbio      | Polyclonal   | High 20 min              | 1:100                   | 4°C, ON           |
| Cyclin B1         | Abcam         | Y106         | Low 20 min               | 1:200                   | 4°C, ON           |
| Cyclin E          | SantaCruz     | HE12         | Low 20 min               | 1:50                    | 4°C, ON           |
| FBXW7             | Abnova        | 3D1          | Low 15 min               | 1:50                    | 37°C, 1 h         |
| E2F-1             | SantaCruz     | KH95         | High 20 min              | 1:50                    | 4°C, ON           |
| p(S364)E2F-1      | Abcam         | Polyclonal   | Low 15 min               | 1:800                   | 4°C, ON           |
| FOXM1             | ThermoFisher  | Polyclonal   | High 20 min              | 1:750                   | 4°C ON            |
| p(S9)GSK3 $\beta$ | Abcam         | EPR2286Y     | Low 20 min               | 1:100                   | 4°C, ON           |
| PLK1              | Cell Signal   | 208G4        | High 20 min              | 1:50                    | 4°C, ON           |
| p(T210)PLK1       | Abcam         | EPNCIR167    | Low 15 min               | 1:6000                  | RT, 0.5h          |
| PPP2R1B           | Novusbio      | Polyclonal   | Low 20 min               | 1:100                   | 4°C, ON           |
| P73               | Abcam         | EP436Y       | High 20 min              | 1:200                   | 4°C, ON           |
| RAD51             | ThermoFisher  | 3C10         | High 30 min              | 1:100                   | 37°C, 1 h         |

ON=overnight; RT=room temperature
